# Supplementary material for: Sensitive and label-free T4 polynucleotide kinase/phosphatase detection based on poly(thymine)-templated copper nanoparticles coupled with nicking enzyme-assisted signal amplification
Source: Royal Society of Chemistry journal article supplement (doi:10.1039/c6ay00306k), 2016-01-01
Supplement: c6ay00306k1.pdf [file c6ay00306k1.pdf]

## Electronic Supplementary Information

### **A sensitive and label-free T4 polynucleotide kinase/phosphatase detection based on poly(thymine)-templated copper nanoparticles coupled with nicking enzyme-assisted signal amplification**

Jia Ge,<sup>\*ab</sup> Lin Zhang,<sup>a</sup> Zhen-Zhen Dong,<sup>a</sup> Qi-Yong Cai,<sup>a</sup> and Zhao-Hui

Li<sup>\*a</sup>

\*Corresponding author.

<sup>a</sup> College of Chemistry and Molecular Engineering, Zhengzhou University, Zhengzhou 450001, P. R. China.

<sup>b</sup> State Key Laboratory of Chemo/Biosensing and Chemometrics, Hunan University, Changsha 410082, P. R. China

Tel.: +86-371-67780037; Fax: +86-371-67781556.

E-mail address: [jiage0630@hnu.edu.cn](mailto:jiage0630@hnu.edu.cn) ; [zhaohui.li@zzu.edu.cn](mailto:zhaohui.li@zzu.edu.cn).

**Table S1.** Comparison of analytical performance of different methods for T4 PNKP activity detection

| <b>Methods</b>           | <b>Detection limit (U/mL)</b> | <b>References</b> |
|--------------------------|-------------------------------|-------------------|
| <sup>32</sup> P-labeling | 0.17                          | 1                 |
| Fluorescence             | 0.04                          | 2                 |
| Fluorescence             | 0.05                          | 3                 |
| Fluorescence             | 0.01                          | 4                 |
| Fluorescence             | 0.02                          | 5                 |
| Fluorescence             | 0.49                          | 6                 |
| Fluorescence             | 0.1                           | 7                 |
| Colorimetric             | 0.06                          | 8                 |
| Luminescence             | 0.05                          | 9                 |
| Electrochemistry         | 0.01                          | 10                |
| Fluorescence             | 0.02                          | Our method        |

**Table S2.** The relative standard deviations of Fig. 3 and Fig. 5.

|        |                                                     |                    |
|--------|-----------------------------------------------------|--------------------|
| Fig. 3 | <b>Concentration of T4 PNKP (U mL<sup>-1</sup>)</b> | <b>RSD(%), n=3</b> |
|        | 0.02                                                | 6.26               |
|        | 0.05                                                | 3.40               |
|        | 0.1                                                 | 4.64               |
|        | 0.2                                                 | 2.80               |
|        | 2                                                   | 1.50               |
|        | 5                                                   | 3.28               |
|        | 10                                                  | 2.50               |
|        | 20                                                  | 2.65               |
| Fig. 5 | <b>Concentration of T4 PNKP (U mL<sup>-1</sup>)</b> | <b>RSD(%), n=3</b> |
|        | 0.02                                                | 5.96               |
|        | 0.05                                                | 3.75               |
|        | 0.1                                                 | 3.60               |
|        | 0.2                                                 | 4.06               |
|        | 2                                                   | 3.94               |
|        | 5                                                   | 3.68               |
|        | 10                                                  | 2.76               |
|        | 20                                                  | 2.86               |

**Fig. S1.** Investigation of the fluorescence intensity of obtained CuNPs as a function of amplification time. (Probe 1, 50 nM; T4 PNKP, 25 U/mL; KF polymerase, 25 U/mL; Nb.BbvCI, 50 U/mL; dNTPs, 200  $\mu$ M; ascorbate, 5 mM;  $\text{Cu}^{2+}$ , 200  $\mu$ M).

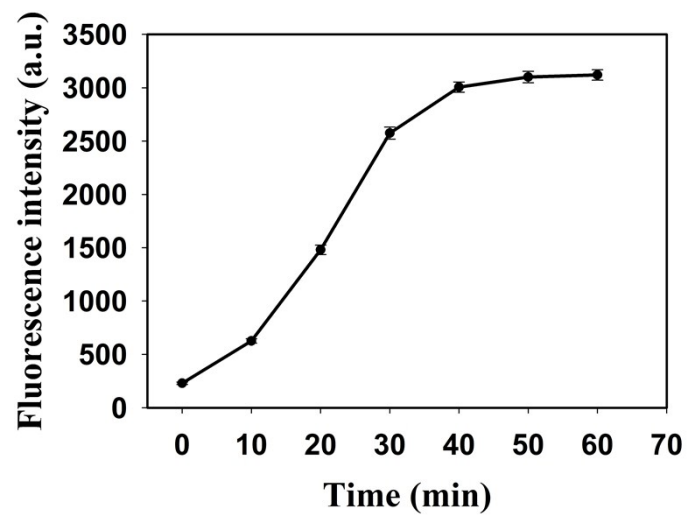

**Fig. S2.** Effect of Nb.BbvCI concentration on fluorescence intensity. The results were the average of three repetitive experiments with error bars indicating the standard deviation. (Probe 1, 50 nM; T4 PNKP, 25 U/mL; KF polymerase, 25 U/mL; dNTPs, 200  $\mu$ M; ascorbate, 5 mM;  $\text{Cu}^{2+}$ , 200  $\mu$ M).

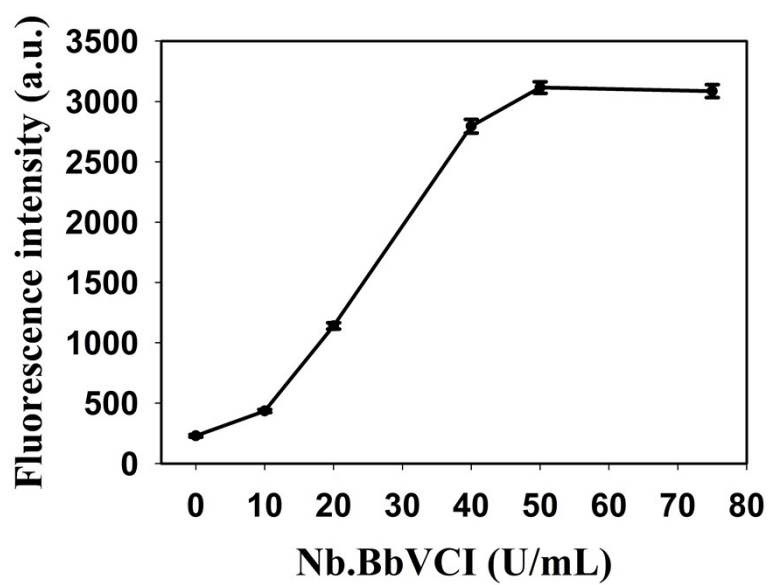

**Fig. S3.** (A) Optimization of dNTPs concentration. The concentration of KF polymerase was 25 U/mL. (B) Optimization of KF polymerase concentration. The concentration of dNTPs was 200  $\mu$ M. (Probe 1, 50 nM; T4 PNKP, 25 U/mL; Nb.BbvCI, 50 U/mL; ascorbate, 5 mM;  $\text{Cu}^{2+}$ , 200  $\mu$ M).

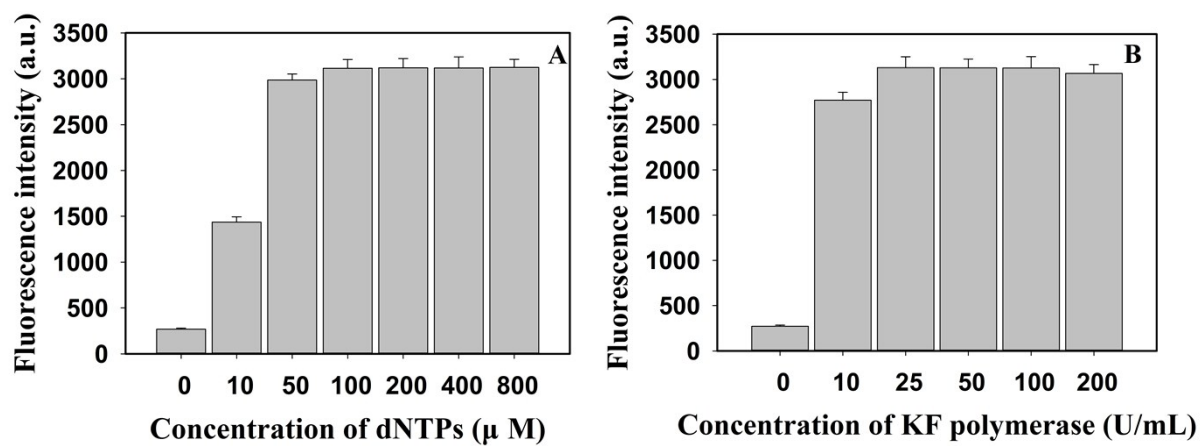

**Fig. S4.** Fluorescence spectra of the obtained CuNPs with T4 PNKP (black histogram) and without T4 PNKP (gray histogram) in the presence of different orders of addition of three enzyme : (1) T4 PNKP + KF polymerase + Nb.BbvCI; (2) T4 PNKP + Nb.BbvCI+ KF polymerase; (3) KF polymerase + T4 PNKP + Nb.BbvCI; (4) KF polymerase + Nb.BbvCI + T4 PNKP; (5) Nb.BbvCI + T4 PNKP + KF polymerase; (6) Nb.BbvCI+ KF polymerase + T4 PNKP. (Probe 1, 50 nM; T4 PNKP, 25 U/mL; KF polymerase, 25 U/mL; Nb.BbvCI, 50 U/mL; dNTPs, 200  $\mu$ M; ascorbate, 5 mM;  $\text{Cu}^{2+}$ , 200  $\mu$ M).

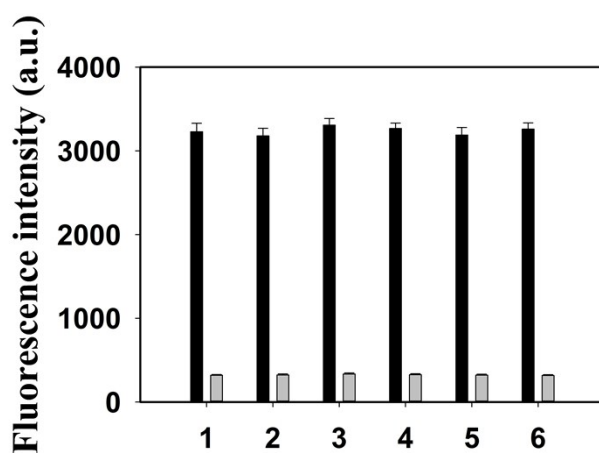

## References:

- 1 F. Karimi-Busheri, G. Daly, P. Robins, B. Canas, D. J. Pappin, J. Sgouros, G. G. Miller, H. Fakhrai, E. M. Davis, M. M. Le Beau and M. Weinfeld, *J. Biol. Chem.*, 1999, **274**, 24187–24194.
- 2 C. Song and M. P. Zhao, *Anal. Chem.*, 2009, **81**, 1383-1388.
- 3 L. Lin, Y. Liu, X. Zhao and J. H. Li, *Anal. Chem.*, 2011, **83**, 8396–8402.
- 4 L. Lin, Y. Liu, J. Yan, X. S. Wang and J. H. Li, *Anal. Chem.*, 2013, **85**, 334–340.
- 5 C. X. Song, X. H. Yang, K. M. Wang, Q. Wang, J. B. Liu, J. Huang, L. L. He, P. Liu, Z. H. Qing and W. Liu, *Chem. Commun.*, 2015, **51**, 1815–1818.
- 6 L. L. Zhang, J. J. Zhao, H. Zhang, J. H. Jiang and R. Q. Yu, *Biosens. Bioelectron.*, 2013, **44**, 6–9.
- 7 Z. Z. Dong, L. Zhang, M. Qiao, Jia. Ge, A. L. Liu and Z. H. Li, *Talanta*, 2016, **146**, 253-258.
- 8 C. Jiang, C. Y. Yan, J. H. Jiang and R. Q. Yu, *Anal. Chim. Acta*, 2013, **766**, 88–93.
- 9 H. Z. He, K. H. Leung, W. Wang, D. S. H. Chan, C. H. Leung and D. L. Ma, *Chem. Commun.*, 2014, **50**, 5313–5315.
- 10 Y. H. Wang, X. X. He, K. M. Wang, X. Q. Ni, J. Su and Z. F. Chen, *Biosens. Bioelectron.*, 2011, **32**, 213–218.
